# Supplementary material for: Detection of Coronaviruses in Bats in Lebanon during 2020
Source: MDPI journal article supplement (doi:10.3390/pathogens12070876), 2023-06-26
Supplement: s1 [file s1]

## Supplementary File

**Table S1.** Representative  $\alpha$ -,  $\beta$ -,  $\gamma$ -, and  $\delta$ - CoV sequences retrieved from National Center for Biotechnology Information (NCBI) that used for degenerated primers design.

| Strain                                                                                                        | Accession no.  |
|---------------------------------------------------------------------------------------------------------------|----------------|
| Rousettus bat coronavirus HKU9, complete genome                                                               | NC_009021.1    |
| Bat SARS-like coronavirus RsSHC014, complete genome                                                           | KC881005.1     |
| Bat SARS-like coronavirus Rs3367, complete genome                                                             | KC881006.1     |
| SARS-like coronavirus BatCoV/BB9904/BGR/2008 spike glycoprotein gene, complete cds                            | KR559017.1     |
| Bat SARS Cov Rs806/2006 spike protein gene, complete cds                                                      | FJ588692.1     |
| Middle East respiratory syndrome-related coronavirus isolate MERS-CoV camel/Kenya/C1272/2018, complete genome | MH734115.1     |
| Murine hepatitis virus strain ML-11                                                                           | AF207902.1     |
| Bovine coronavirus isolate BCoV_2014_13, complete genome                                                      | KX982264.1     |
| Human coronavirus OC43 strain HCoV-OC43/UK/London/2011, complete genome                                       | KU131570.1     |
| Human coronavirus HKU1 strain HKU1/human/USA/HKU1-18/2010, complete genome                                    | KF430201.1     |
| Coronavirus IBV gene for spike protein precursor (infectious bronchitis virus)                                | X02342.1       |
| Porcine deltacoronavirus strain PDCV_ZJ17HZ0102 spike protein mRNA, complete cds                              | MF461412.1     |
| Human coronavirus 229E isolate HCoV-229E/BN1/GER/2015, complete genome                                        | KU291448.1     |
| Human coronavirus NL63 strain NL63/human/USA/891-4/1989, complete genome                                      | KF530114.1     |
| Porcine epidemic diarrhea virus isolate PEDV YZ, complete genome                                              | MK841495.1     |
| Transmissible gastroenteritis virus strain TGEV AHHF, complete genome                                         | KX499468.1     |
| Feline coronavirus strain FIPV 79-1146, complete genome                                                       | DQ010921.1     |
| Sable antelope coronavirus US/OH1/2003                                                                        | EF424621.1     |
| Bottlenose dolphin coronavirus HKU22 isolate CF090331, complete genome                                        | KF793826.1     |
| Bulbul coronavirus HKU11-934                                                                                  | FJ376619.2     |
| Beluga Whale coronavirus SW1                                                                                  | NC_010646.1    |
| Common-moorhen coronavirus HKU21                                                                              | NC_016996.1    |
| Dromedary camel coronavirus HKU23                                                                             | KF906251.1     |
| Betacoronavirus Erinaceus/VMC/DEU/2012                                                                        | NC_039207.1    |
| Feline infectious peritonitis virus                                                                           | AY994055.1     |
| Hipposideros bat coronavirus HKU10 isolate LSH5A                                                              | JQ989269.1     |
| Avian infectious bronchitis virus partridge/GD/S14/2003                                                       | AY646283.1     |
| Avian infectious bronchitis virus isolate Peafowl/GD/KQ6/2003                                                 | AY641576.1     |
| Mouse hepatitis virus strain MHV-A59 C12                                                                      | NC_001846.1    |
| Bat coronavirus HKU8                                                                                          | NC_010438.1    |
| Magpie-robin coronavirus HKU18                                                                                | NC_016993.1    |
| Munia coronavirus HKU13-3514                                                                                  | FJ376622.1     |
| Night-heron coronavirus HKU19                                                                                 | NC_016994.1    |
| Porcine epidemic diarrhea virus                                                                               | NC_003436.1    |
| Porcine hemagglutinating encephalomyelitis virus                                                              | NC_007732.1    |
| Wigeon coronavirus HKU20                                                                                      | NC_016995.1    |
| Scotophilus bat coronavirus 512                                                                               | NC_009657.1    |
| Sparrow coronavirus HKU17                                                                                     | NC_016992.1    |
| Turkey coronavirus                                                                                            | NC_010800.1    |
| Thrush coronavirus HKU12-600                                                                                  | FJ376621.1     |
| covid-19/NRC-3/2020                                                                                           | EPI_ISL_430820 |

**Table S2.** Primers used for sequencing of the spike.

| Primer name | Sequences               |
|-------------|-------------------------|
| spike 1F    | CCTTTGACATGAGTAAATTTC   |
| Spike 1R    | GTTTTGTGAACAATCTACGGCAT |
| spike 2F    | TATACTACTGCTACCAACTGCAC |
| Spike 2R    | TCACTAATGCGCATTCTCCCC   |

|          |                             |
|----------|-----------------------------|
| spike 3F | AGAGTTTCTCCTAGTACTGAAG      |
| Spike 3R | CAGGTGTGATAACACTGACACC      |
| spike 4F | AATGGACTCACAGGCACAGGTGT     |
| Spike 4R | CAGCAAAGGGGGTAGAACTGTTAAGCC |
| spike 5F | TGTCGAACAAGACAGAAATACTAGGG  |
| Spike 5R | GTCGTCTTCATCAAATTTGCAGCAGG  |
| spike 6F | TTAGAGCTGCAGAAATCAGAGC      |
| Spike 6R | CTCCTTTGAGCACTGGCTCAGA      |

**Table S3.** Nucleotide sequence identities between partial RdRp sequences detected in bats in Lebanon and nearest published sequences in GenBank based on BLASTN analysis.

| Sequence identifier         | GenBank Accession Number | Relative strain                                | GenBank Accession Number | Identity to matched sequence (%) |
|-----------------------------|--------------------------|------------------------------------------------|--------------------------|----------------------------------|
| LB20-CO-BAT-37A.Beta-CoV    | MW880969                 | Betacoronavirus BtCoV/Rhi_bla/BB98-22/BGR/2008 | KC633201.1               | 97                               |
| LB20-CO-BAT-86A.Beta-CoV    | MW880970                 | Betacoronavirus BtCoV/Rhi_bla/BB98-22/BGR/2008 | KC633201.1               | 98                               |
| LB20-CO-BAT-46A.Beta-CoV    | MW880971                 | Betacoronavirus BtCoV/Rhi_bla/BB98-22/BGR/2008 | KC633201.1               | 98                               |
| LB20-CO-BAT-92A.Beta-CoV    | MW880972                 | Betacoronavirus BtCoV/Rhi_bla/BB98-22/BGR/2008 | KC633201.1               | 98                               |
| LB20-CO-BAT-137A.Beta-CoV   | MW880973                 | Betacoronavirus BtCoV/Rhi_bla/BB98-22/BGR/2008 | KC633201.1               | 98                               |
| LB20-CO-BAT-11A.Bat-CoV     | MW880974                 | Bat coronavirus BR98-55/BGR/2008               | GU190240.1               | 96                               |
| LB20-CO-BAT-82A.Bat-CoV     | MW880975                 | Bat coronavirus BR98-55/BGR/2008               | GU190240.1               | 97                               |
| LB20-CO-BAT-100A.Beta-CoV   | MW880976                 | Bat coronavirus BM48-31/BGR/2008               | KC633201.1               | 98                               |
| LB20-CO-BAT-51A.Alpha-CoV   | MW880977                 | Alphacoronavirus sp. isolate 11F               | MN701038.1               | 98                               |
| LB20-CO-BAT-78A.Beta-CoV    | MW880978                 | Betacoronavirus BtCoV/Rhi_bla/BB98-22/BGR/2008 | KC633201.1               | 98                               |
| LB20-CO-BAT-116A.Beta-CoV   | MW880979                 | Betacoronavirus BtCoV/Rhi_bla/BB98-22/BGR/2008 | KC633201.1               | 98                               |
| LB20-CO-BAT-32A.Bat-CoV     | MW880980                 | Bat coronavirus BM48-39/BGR/2008               | GU190234.1               | 99                               |
| LB20-CO-BAT-74A.Bat-CoV     | MW880981                 | Bat coronavirus BM48-39/BGR/2008               | GU190234.1               | 99                               |
| LB20-CO-BAT-58A.Beta-CoV    | MW880982                 | Betacoronavirus BtCoV/Rhi_bla/BB98-22/BGR/2008 | KC633201.1               | 98                               |
| LB20-CO-BAT-80A.Beta-CoV    | MW880983                 | Betacoronavirus BtCoV/Rhi_bla/BB98-22/BGR/2008 | KC633201.1               | 98                               |
| LB20-CO-BAT-14A.Beta-CoV    | MW880984                 | Betacoronavirus BtCoV/Rhi_bla/BB98-22/BGR/2008 | KC633201.1               | 97                               |
| LB20-CO-BAT-29A.Bat-CoV     | MW880986                 | Bat coronavirus BR98-55/BGR/2008               | GU190240.1               | 98                               |
| LB20-CO-BAT-162A.Beta-CoV   | MW880987                 | Betacoronavirus BtCoV/Rhi_bla/BB98-22/BGR/2008 | KC633201.1               | 98                               |
| LB20-CO-BAT-93A.Beta-CoV    | MW880988                 | Betacoronavirus BtCoV/Rhi_bla/BB98-22/BGR/2008 | KC633201.1               | 98                               |
| LB20-CO-BAT-70A.Beta-CoV    | MW880989                 | Betacoronavirus BtCoV/Rhi_bla/BB98-22/BGR/2008 | KC633201.1               | 98                               |
| LB20-CO-BAT-132A.Beta-CoV   | MW880990                 | Betacoronavirus BtCoV/Rhi_bla/BB98-22/BGR/2008 | KC633201.1               | 98                               |
| LB20-CO-BAT-56A.Beta-CoV    | MW880991                 | Betacoronavirus BtCoV/Rhi_bla/BB98-22/BGR/2008 | KC633201.1               | 98                               |
| LB20-CO-BAT-15A.Beta-CoV    | MW880992                 | Bat coronavirus BR98-55/BGR/2008               | GU190240.1               | 97                               |
| LB20-CO-BAT-22A.Beta-CoV    | MW880993                 | Betacoronavirus BtCoV/Rhi_bla/BB98-22/BGR/2008 | KC633201.1               | 98                               |
| LB20-CO-BAT-134A.Bat-SL-CoV | MW880994                 | BtMs-AlphaCoV/GS2013                           | KJ473810.1               | 97                               |
| LB20-CO-BAT-96A.Beta-CoV    | MW880995                 | Betacoronavirus BtCoV/Rhi_bla/BB98-22/BGR/2008 | KC633201.1               | 98                               |
| LB20-CO-BAT-85A.Beta-CoV    | MW880996                 | Betacoronavirus BtCoV/Rhi_bla/BB98-22/BGR/2008 | KC633201.1               | 98                               |
| LB20-CO-BAT-39A.Bat-CoV     | MW880997                 | Bat coronavirus BR98-55/BGR/2008               | GU190240.1               | 95                               |
| LB20-CO-BAT-91A.Beta-CoV    | MW880998                 | Betacoronavirus BtCoV/Rhi_bla/BB98-22/BGR/2008 | KC633201.1               | 98                               |
| LB20-CO-BAT-26A.Beta-CoV    | MW880999                 | Betacoronavirus BtCoV/Rhi_bla/BB98-22/BGR/2008 | KC633201.1               | 98                               |
| LB20-CO-BAT-30A.Bat-CoV     | MW881000                 | Bat coronavirus BR98-55/BGR/2008               | GU190240.1               | 97                               |
| LB20-CO-BAT-49A.Bat-CoV     | MW881002                 | Bat coronavirus BR98-55/BGR/2008               | GU190240.1               | 99                               |
| LB20-CO-BAT-55A.Bat-CoV     | MW881003                 | Bat coronavirus BR98-55/BGR/2008               | GU190240.1               | 99                               |
| LB20-CO-BAT-60A.Beta-CoV    | MW881004                 | Betacoronavirus BtCoV/Rhi_bla/BB98-22/BGR/2008 | KC633201.1               | 98                               |
| LB20-CO-BAT-72A.Bat-CoV     | MW881005                 | Bat coronavirus BR98-55/BGR/2008               | GU190240.1               | 99                               |
| LB20-CO-BAT-19A.Beta-CoV    | MW881006                 | Betacoronavirus BtCoV/Rhi_bla/BB98-22/BGR/2008 | KC633201.1               | 98                               |
| LB20-CO-BAT-89A.Beta-CoV    | MW881007                 | Betacoronavirus BtCoV/Rhi_bla/BB98-22/BGR/2008 | KC633201.1               | 98                               |
| LB20-CO-BAT-87A.Beta-CoV    | MW881008                 | Betacoronavirus BtCoV/Rhi_bla/BB98-22/BGR/2008 | KC633201.1               | 98                               |
| LB20-CO-BAT-98A.Beta-CoV    | MW881009                 | Betacoronavirus BtCoV/Rhi_bla/BB98-22/BGR/2008 | KC633201.1               | 98                               |
| LB20-CO-BAT-20A.Beta-CoV    | MW881011                 | Betacoronavirus BtCoV/Rhi_bla/BB98-22/BGR/2008 | KC633201.1               | 98                               |
| LB20-CO-BAT-40A.Bat-CoV     | MW881012                 | BtMs-AlphaCoV/GS2013                           | KJ473810.1               | 97                               |
| LB20-CO-BAT-126A.Beta-CoV   | MW881013                 | Betacoronavirus BtCoV/Rhi_bla/BB98-22/BGR/2008 | KC633201.1               | 98                               |

**Table S4.** Interactions between the novel spike and ACE2 receptor at different simulation times.

| 0ns    |        | 50ns   |        | 100ns  |        | 150ns  |        | 200ns  |        |
|--------|--------|--------|--------|--------|--------|--------|--------|--------|--------|
| SetA   | SetB   |
| Asn324 | Glu564 | Arg318 | Asp213 | Arg318 | Asp213 | Arg318 | Asp213 | Arg318 | Asp213 |
| Gln330 | Gln388 | Asn324 | Ser563 | Gln330 | Met383 | Asn324 | Ser563 | Asn324 | Thr92  |
| Gln330 | Arg559 | Asn324 | Glu564 | Gln330 | Ala387 | Asn324 | Glu564 | Cys326 | Gln388 |
| Cys351 | Gln89  | Gln330 | Met383 | Asp350 | Asn90  | Cys326 | Ala387 | Gln330 | Met383 |
| Cys351 | Asn90  | Gln330 | Ala387 | Asp354 | Lys26  | Cys326 | Gln388 | Gln330 | Ala387 |
| Asp354 | Lys26  | Asp354 | Lys26  | Asp354 | Asn90  | Gln330 | Met383 | Asp350 | Asn90  |
| Asp354 | Asn90  | Asp354 | Asn90  | Tyr355 | Ala387 | Gln330 | Ala387 | Asp354 | Lys26  |
| Asp354 | Thr92  | Tyr355 | Ala387 | Tyr359 | Asp30  | Asn333 | Gly319 | Asp354 | Asn90  |
| Tyr359 | Asp30  | Tyr359 | Asp30  | Lys377 | Glu23  | Asp350 | Asn90  | Tyr359 | Asp30  |
| Asn360 | Asp30  | Ser431 | Asn322 | Lys515 | Glu22  | Asp354 | Lys26  | Lys515 | Glu22  |
| Asn360 | Ala387 | Asp433 | Asn322 | Gln661 | Gln24  | Asp354 | Asn90  | Lys515 | Gln89  |
| Ser431 | Asn322 | Lys515 | Gln89  | Gly663 | Ser19  | Tyr359 | Asp30  | Ser517 | Gln89  |
| Asp486 | Gln325 | Asp667 | Ser19  | Asp667 | Ser19  | Lys377 | Glu23  | Gln550 | Asp213 |
| Ala658 | Ser19  | Tyr732 | Thr78  | Phe699 | Met82  | Asn428 | Met383 | Gln656 | Ser19  |
| Ile688 | Lys68  | Lys736 | Glu75  | Gln719 | Arg192 | Lys515 | Glu22  | Gln661 | Tyr83  |
| Lys690 | Glu75  |        |        | Ser727 | Val107 | Gln656 | Ser19  | Thr662 | Ser19  |
| Gln728 | Gln101 |        |        | Tyr732 | Glu75  | Gln661 | Lys31  | Thr662 | Gln24  |
| Leu729 | Gln81  |        |        | Tyr732 | Thr78  | Thr662 | Ser19  | Cys731 | Thr78  |
| Cys731 | Thr78  |        |        | Lys736 | Glu75  | His701 | Gln81  | Cys731 | Met82  |
| Cys731 | Gln81  |        |        |        |        | Gln728 | His195 | Tyr732 | Thr78  |
|        |        |        |        |        |        | Tyr732 | Thr78  |        |        |
|        |        |        |        |        |        | Gln733 | Met82  |        |        |

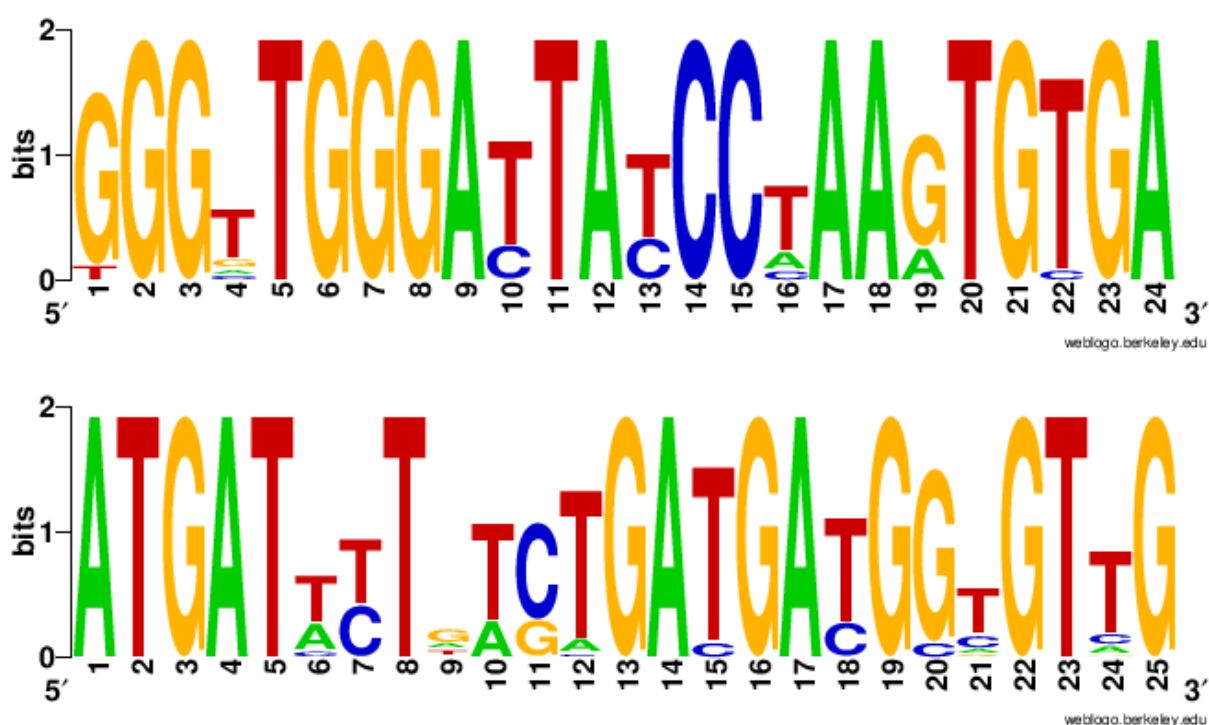

**Figure S1.** Graphic illustration of the selected conserved regions that was created via a Web-based WebLogo application (<http://weblogo.threeplusone.com/create.cgi>).

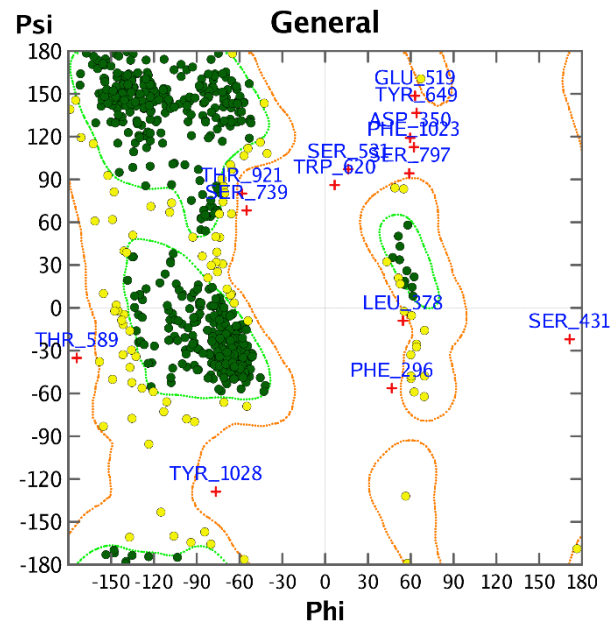

**Figure S2.** the Ramachandran plot of the novel SAR-CoV-2 spike.

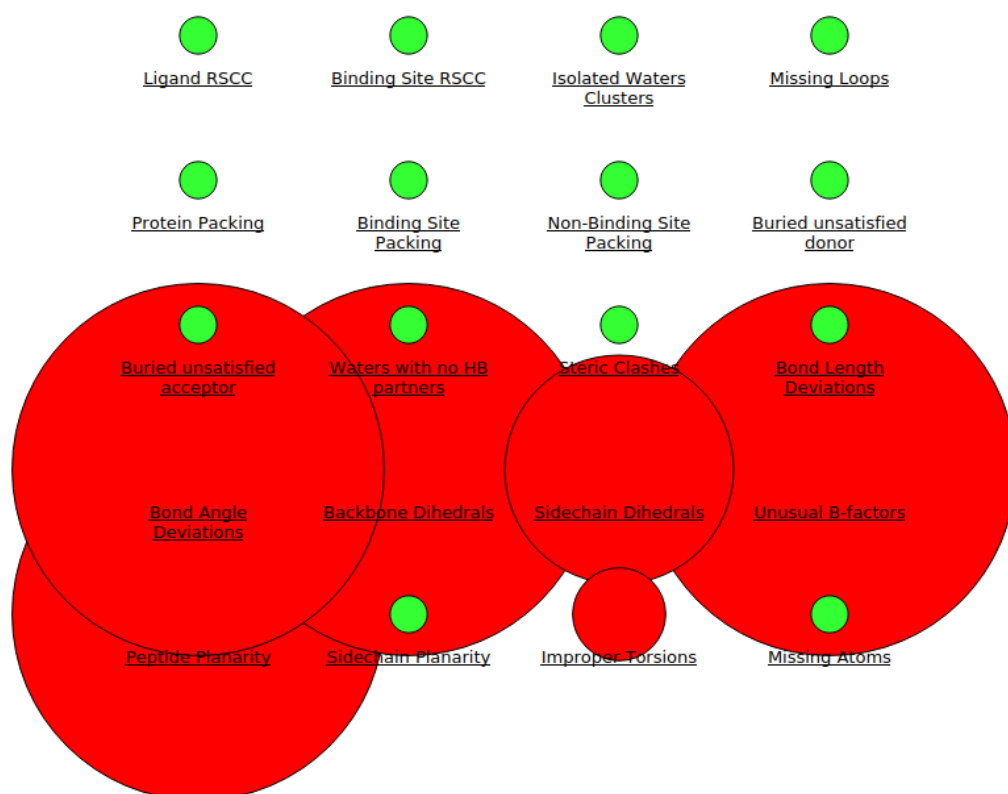

**Figure S3.** Validation of the homology modelling results of the novel SAR-CoV-2 spike.

```

Query 4  FIFLSFLPLITAQE--GCGVLSNKSTPNLDQFLSSKRGFYFDDTFRSSVRVLTSGYFLP 61
FIFL FL L + + C + PN Q SS RG YY D+FRS LT FLP
Sbjct 2  FIFLLFLTSLTSGSDDLDRCTTFDDVQAPNYTQHTSSMRGVVYPDEIFRSDTLTQDLFLP 61

Query 62  FQSNLTRYLTLESITGRRIYFDNPNIPIKDGLYFAATEKSNVIRGWIFGSTLDNTTQSAV 121
F SN+T + T+ F NP IPFKDG+YFAATEKSNV+RGW+FGST++N +QS +
Sbjct 62  FYSNVTGFHTINHT-----FGNPVIPFKDGIYFAATEKSNVVRGWVFGSTMNNKSQSVI 115

Query 122 LFNNGTHIVINVCNFCQDPMLAISA--GSPYKSWVYTTATNCTYNRLH-AFNISTNIN 178
+ NN T++VI CNF C+P A+S G+ ++ A NCT+ + AF++ +
Sbjct 116 IINNSTNVVIRACNFELCDNPFFAVSKPMGTQTHMIFDNAFNCTFEYISDAFSLDVSEK 175

Query 179 PGFSVHLREHVFVRNVDGFLYVYHNYESINVTNTFPGGFSVLKPKLPFGLNITHFKVIM 238
G+F HLRE VF+N DGFLYVY Y+ I+V P GF+ LKPI KLP G+NIT+F+ I+
Sbjct 176 SGNFKHLREFVFKNKDGFLYVYKGYQPIDVVRDLPSGFNTLKPIFKLPLGINITNFRAIL 235

Query 239 TLFSNTTQSFEADASAYFVGHKLPLTMLADFDENGITVDVDCSQNPLSELKCTTKSFSV 298
T FS + A+AYFVG+LKP T+ +DENGTI DAVDCSQNPL+ELKC+ KSF +
Sbjct 236 TAFSPAQDIWGTSAAYFVGYLKPTTFMLKYDENGITITDAVDCSQNPLAELKCSVKSFEI 295

Query 299 EKGiyQTSNFRVSPSTEVVRFPNITNLCPPGQVFNASTFPSVYAWGRMRISDCVADYSVL 358
+KGIYQTSNFRV PS +VVRFPNITNLCPPG+VFNA+ FPSVYAW R +IS+CVADYSVL
Sbjct 296 DKGIYQTSNFRVPSGDVVRFPNITNLCPPGEVFNATKFPSVYAWERKKISNCVADYSVL 355

Query 359 YNSTSSFSTFKCYGVSPTKLNDLCFSSVYADYFVVKGDDVRQIAPAQTGVIADYNYKLPD 418
YNST FSTFKCYGVS TKLNDLCFS+VYAD FVVKGDDVRQIAP QTGVIADYNYKLPD
Sbjct 356 YNSTF-FSTFKCYGVSATKLNDLCFSNVYADSFVVKGDDVRQIAPGQTGVIADYNYKLPD 414

Query 419 DFTGCVLAWNTKSIDKGQ---GFYRFLFRHGKIKPYERDTSNVPYNAQGGTCTDTSQLN 474
DF GCVLAWNT++ID + YR RHGK++P+ERD SNVP++ G CT + LN
Sbjct 415 DFMGCVLAWNTRNIDATSTGNYNYKYRYLRHGKLRPFERDISNVPFSPDGKPTPPA-LN 473

Query 475 CYQPLKSYDFTDTVGIGYQPYRVVLSFELLNAPATVCGPKQSTELVKNKCVNFNFSGLT 534
CY PL Y F T GIGYQPYRVVLSFELLNAPATVCGPK ST+L+KN+CVNFNF+GLT

```

Sbjct 474 CYWPLNDYGFTTTGIGYQPYRVVLSFELLNAPATVCGPKLSTDLIKNQCVNFNFNGLT 533

Query 535 GTGVLTDSTKRFQPFQQFGRDISDFTDSVRDPKTLQILDISPCSYGGVSVITPGTNASNV 594  
GTGVLTS+KRFQPFQQFGRD+SDFTDSVRDPKT +ILDISPCS+GGVSVITPGTNAS+

Sbjct 534 GTGVLTPSSKRFQPFQQFGRDVSDFTDSVRDPKTSEILDISPCSFGGVSVITPGTNASSE 593

Query 595 VAVLYQDVNCTDVPTMLHAEQVAHDWRVYAVNTDGNMFQTQAGCLVGATYDNTSYECDIP 654  
VAVLYQDVNCTDV T+HA+Q+ WR+Y+ T N+FQTQAGCL+GA ++TSYECDIP

Sbjct 594 VAVLYQDVNCTDVSTAIHADQLTPAWRIYS--TGNNVFQTQAGCLIGAEHVDTSYECDIP 651

Query 655 IGAGVCAKFGSTKM---RQQSILAYTMSIGEDQSVAYSNNNSIAIPTNFSISVTTEVLPV 710  
IGAG+CA ++ + Q+SI+AYTMS+G D S+AYSNN+IAIPTNFSIS+TTEV+PV

Sbjct 652 IGAGICASYHTVSLLASTSQKSIVAYTMSLGADSSIAYSNNTIAIPTNFSISITTEVMPV 711

Query 711 SMTKTSVDCNMYICGDSTECNLLQYGSFCTQLNRALSGIAVEQDRNTRDVFAQTKTIY 770  
SMKTSVDCNMYICGDSTEC+NLLQYGSFCTQLNRALSGIA EQDRNTR+VFAQ K+Y

Sbjct 712 SMAKTSVDCNMYICGDSTECANLLQYGSFCTQLNRALSGIAAEQDRNTREVFAQVKQMY 771

Query 771 KTPNIKDFGGFNFSQILPDPGKPSQRSFIEDLLYNKVTLADPGFMKQYGDCLGGINARDL 830  
KTP +K FGGFNFSQILPDP KP++RSFIEDLL+NKVTLAD GFMKQYG+CLG INARDL

Sbjct 772 KPTPLKYFGGFNFSQILPDKPTKRSFIEDLLFNKVTLADAGFMKQYGECLGDINARDL 831

Query 831 ICAQKFNGLTVLPPLTDDMIAAYTAALISgtatagytfgagaaLQIPFAMQMAYRFNGI 890  
ICAQKFNGLTVLPPLTDDMIAAYTAAL+SGTATAG+TFGAGAALQIPFAMQMAYRFNGI

Sbjct 832 ICAQKFNGLTVLPPLTDDMIAAYTAALVSGTATAGWTFGAGAALQIPFAMQMAYRFNGI 891

Query 891 GVTQNVLYENQKQIANQFNKAISQIQDSLTTTALGKLQDVINQNAQALNTLVKQLSSN 950  
GVTQNVLYENQKQIANQFNKAISQIQ+SLTTT+TALGKLQDV+NQNAQALNTLVKQLSSN

Sbjct 892 GVTQNVLYENQKQIANQFNKAISQIQESLTTTSTALGKLQDVVNQNAQALNTLVKQLSSN 951

Query 951 FGAISSVLNDILSRDLKVEAEVQIDRLITGRLQSLQTYVTQQLIRAAEIRASANLAATKM 1010  
FGAISSVLNDILSRDLKVEAEVQIDRLITGRLQSLQTYVTQQLIRAAEIRASANLAATKM

Sbjct 952 FGAISSVLNDILSRDLKVEAEVQIDRLITGRLQSLQTYVTQQLIRAAEIRASANLAATKM 1011

Query 1011 SECVLGQSKRVDFCGKGYHLMSPQAAPHGVVFLHVTYVPSEQKNFTTAPAICHNGKAYF 1070  
SECVLGQSKRVDFCGKGYHLMSPQAAPHGVVFLHVTYVPS+++NFTTAPAICH GKAYF

Sbjct 1012 SECVLGQSKRVDFCGKGYHLMSPQAAPHGVVFLHVTYVPSQERNFTTAPAICHEGKAYF 1071

Query 1071 PREGVFVMNGTHWFITQRNFYSPQVITTDNTFESGTCDDVIGIVNNTVYDPLQPELESFK 1130  
PREGVFV NGT WFITQRNF+SPQ+ITTDNTF SG CDVVIGI+NNTVYDPLQPEL+SFK

Sbjct 1072 PREGVFVFNGTSWFITQRNFFSPQIITTDNTFVSGNCDVIGIINNTVYDPLQPELDSFK 1131

Query 1131 QELDKYFKNHTSPDVDLGDISGINASVVDIKKEIEHLNEIAKNLNESLIDLQELGKYEYQ 1190  
+ELDKYFKNHTSPDVDLGDISGINASVV+I+KEI+ LNE+AKNLNESLIDLQELGKYEYQ

Sbjct 1132 EELDKYFKNHTSPDVDLGDISGINASVVNIQKEIDRLNEVAKNLNESLIDLQELGKYEYQ 1191

Query 1191 IKWPW 1195  
IKWPW

Sbjct 1192 IKWPW 1196

**Figure S4.** Sequence alignment of the wild and the novel spike proteins.

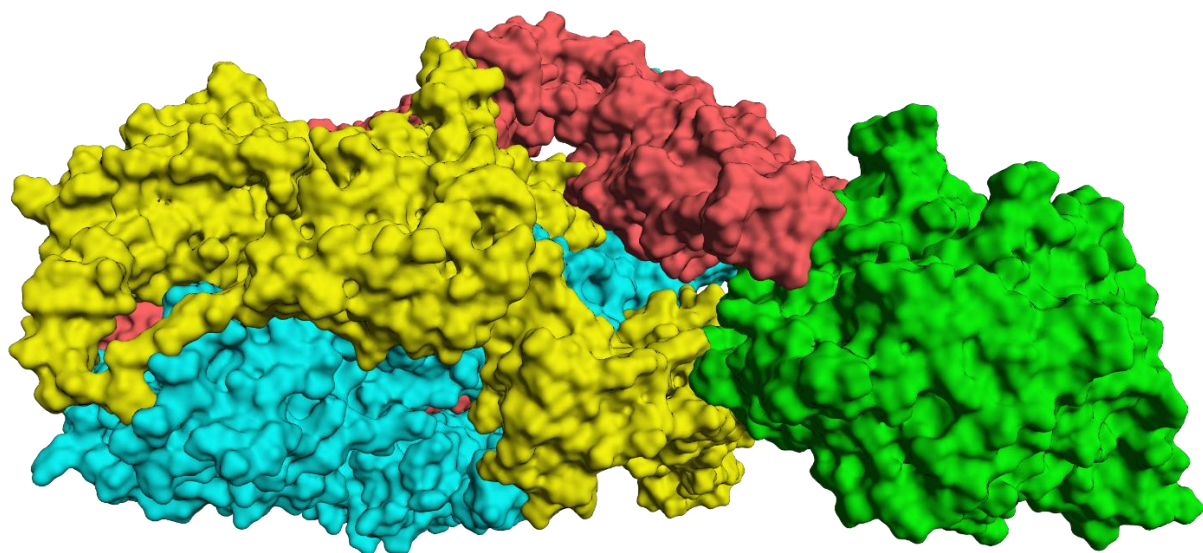

**Figure S5.** wild-ACE (green) interaction.

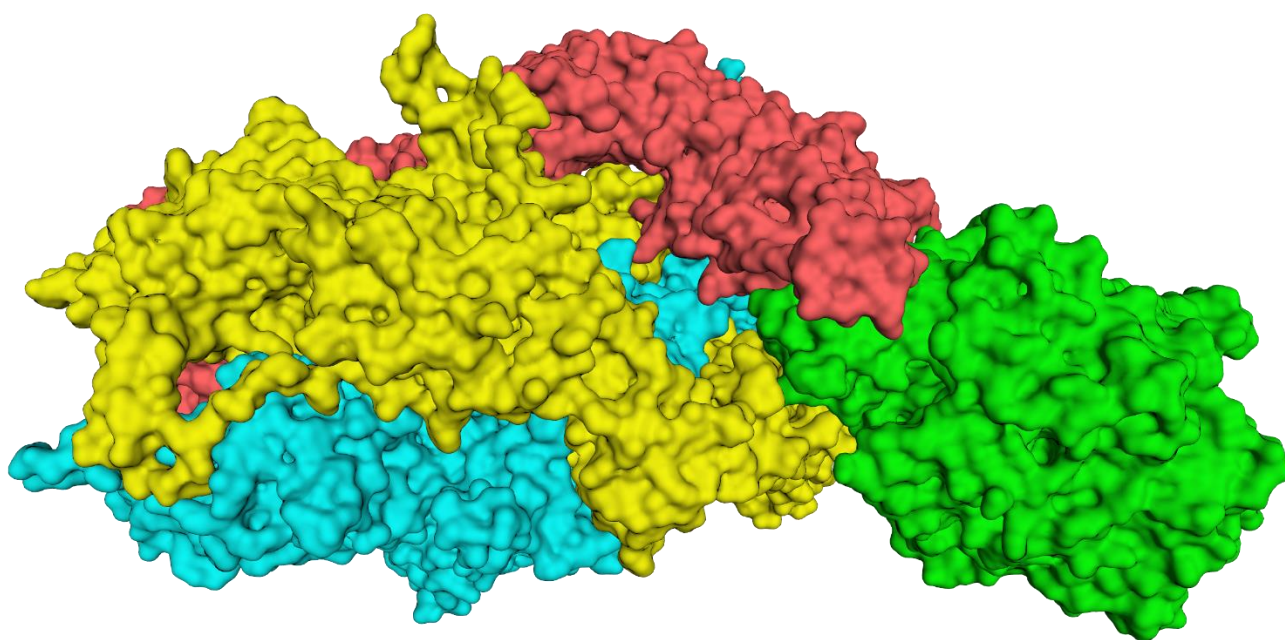

**Figure S6.** Novel-ACE2 (green) interaction.



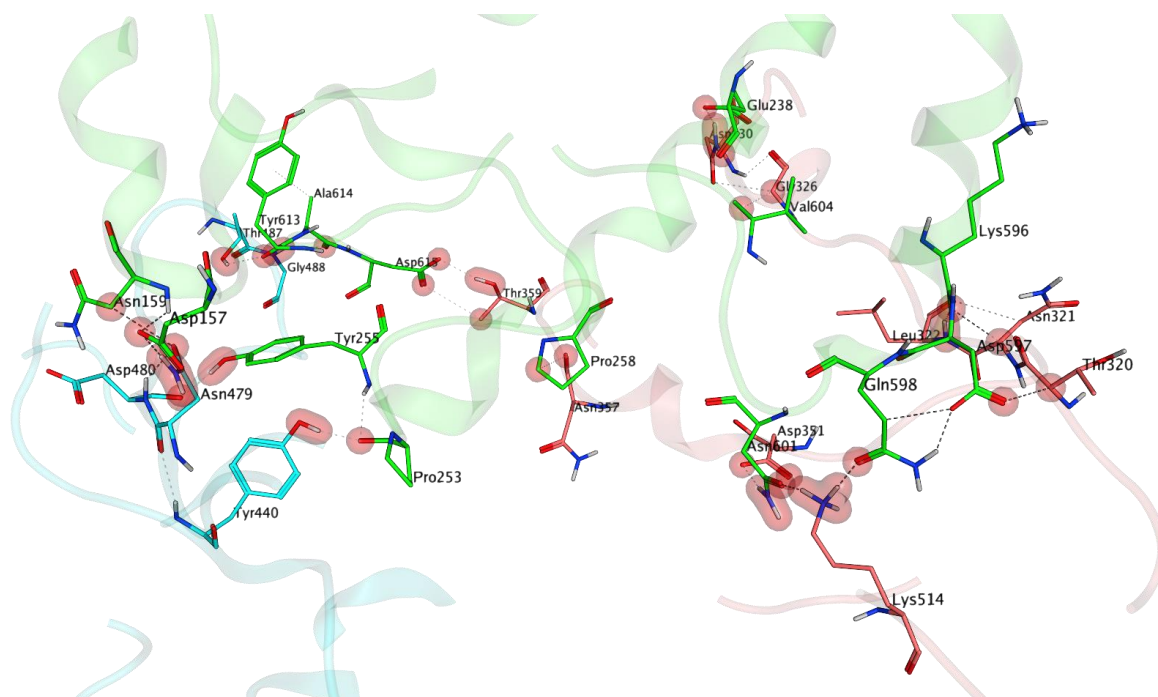

**Figure S7.** Wild-ACE2 interactions.

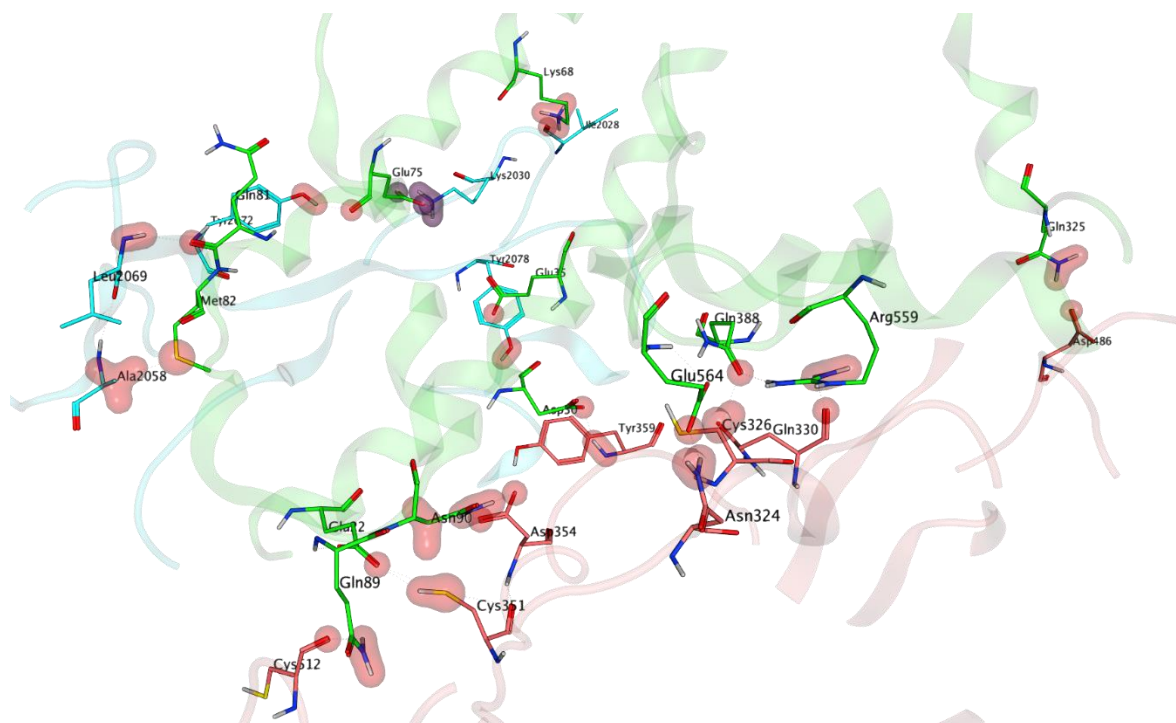

**Figure S8.** Novel-ACE2 interactions.
